# Supplementary material for: Structural chemistry of (PPh4)2M(WS4)2 materials
Source: Royal Society of Chemistry journal article supplement (doi:10.1039/b716407f), 2008-01-01
Supplement: b716407f.pdf [file b716407f.pdf]

## Structural Chemistry of $(\text{PPh}_4)_2\text{M}(\text{WS}_4)_2$ Materials

Clare J. Crossland,<sup>\*a</sup> Ivana R. Evans<sup>a,b</sup> and John S.O. Evans<sup>b</sup>

| Atom | $x/a$       | $y/b$      | $z/c$       | $U_{\text{iso}}/\text{\AA}^2$ |
|------|-------------|------------|-------------|-------------------------------|
| Ni   | 0.0         | 0.0        | 0.0         | 0.129 (1)                     |
| W    | -0.0953 (4) | 0.2609 (3) | -0.1236 (3) | 0.129 (1)                     |
| S1   | -0.227 (2)  | 0.142 (1)  | -0.057 (1)  | 0.129 (1)                     |
| S2   | 0.135 (2)   | 0.130 (1)  | -0.085 (1)  | 0.129 (1)                     |
| S3   | -0.108 (1)  | 0.355 (1)  | -0.021 (1)  | 0.129 (1)                     |
| S4   | -0.137 (1)  | 0.375 (1)  | -0.309 (1)  | 0.129 (1)                     |
| P    | 0.5782 (6)  | 0.2443 (5) | 0.3395 (5)  | 0.153 (4)                     |

Fractional atomic coordinates and isotropic temperature factors for atoms in  $(\text{PPh}_4)_2\text{Ni}(\text{WS}_4)_2$ .

|                         |           |
|-------------------------|-----------|
| $x_{\text{rot}}/^\circ$ | 16.0 (2)  |
| $y_{\text{rot}}/^\circ$ | 26.4 (2)  |
| $z_{\text{rot}}/^\circ$ | 203.0 (2) |
| torsion 1 $/^\circ$     | 17.1 (8)  |
| torsion 2 $/^\circ$     | -67.7 (7) |
| torsion 3 $/^\circ$     | 18.9 (6)  |
| torsion 4 $/^\circ$     | 83.2 (7)  |

Torsion angles and rotations about the axes for the rigid  $\text{PPh}_4^+$  cation in  $(\text{PPh}_4)_2\text{Ni}(\text{WS}_4)_2$ .

| Bond Lengths / $\text{\AA}$ |          | Bond Angles $/^\circ$ |           |
|-----------------------------|----------|-----------------------|-----------|
| Ni – S                      | 2.12 (1) | S – Ni – S            | 180       |
|                             | 2.25 (2) |                       | 83.4 (4)  |
|                             |          |                       | 96.6 (4)  |
| W – S                       | 2.03 (2) | S – W – S             | 102.1 (4) |
|                             | 2.11 (2) |                       | 102.3 (3) |
|                             | 2.16 (1) |                       | 110.8 (4) |
|                             | 2.17 (1) |                       | 111.7 (4) |
|                             |          |                       | 113.5 (6) |
|                             |          |                       | 115.2 (4) |

Bond lengths and angles in the anionic units in  $(\text{PPh}_4)_2\text{Ni}(\text{WS}_4)_2$ .

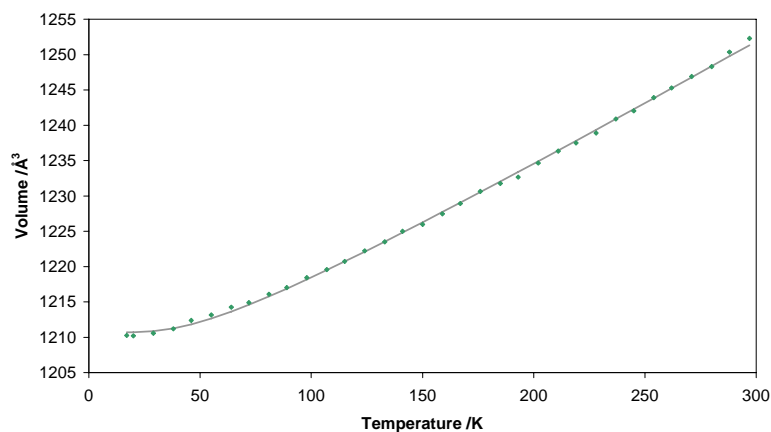

Change in cell volume of  $(\text{PPh}_4)_2\text{Ni}(\text{WS}_4)_2$  on cooling. Data are shown in green, calculated values are shown in grey.

|                                                   | <i>a</i>                  | <i>b</i>                  | <i>c</i>                  |
|---------------------------------------------------|---------------------------|---------------------------|---------------------------|
| $a_0 / \text{Å}$                                  | 9.2640 (6)                | 12.3422 (6)               | 12.3776 (6)               |
| $\theta_i / \text{K}$                             | 162 (7)                   | 119 (4)                   | 124 (6)                   |
| $c_i / \text{K}^{-1}$                             | $52.2 (7) \times 10^{-6}$ | $50.2 (4) \times 10^{-6}$ | $45.1 (4) \times 10^{-6}$ |
| $\alpha_{15\text{K}-300\text{K}} / \text{K}^{-1}$ | $41.6 (8) \times 10^{-6}$ | $43.3 (5) \times 10^{-6}$ | $38.5 (6) \times 10^{-6}$ |

Thermal expansion parameters for  $(\text{PPh}_4)_2\text{Ni}(\text{WS}_4)_2$  using the expression:

$$\ln a_{\text{calc}} = \ln a_0 + \sum_0^i \frac{c_i \theta_i}{\exp(\theta_i/T) - 1}$$

| Bond lengths / Å |           | Bond angles / ° |             |
|------------------|-----------|-----------------|-------------|
| Zn1 – S1         | 2.387 (1) | S1 – Zn1 – S1   | 116.07 (3)  |
| W1 – S1          | 2.234 (1) | S1 – Zn1 – S1   | 96.95 (6)   |
| W1 – S2          | 2.161 (1) | S1 – W1 – S1    | 106.20 (7)  |
| P1 – C1          | 1.791 (3) | S1 – W1 – S2    | 110.38 (5)  |
| C1 – C2          | 1.403 (4) | S1 – W1 – S2    | 110.50 (5)  |
| C1 – C4          | 1.395 (4) | S2 – W1 – S2    | 108.88 (8)  |
| C2 – C3          | 1.385 (4) | C1 – P1 – C1    | 110.21 (9)  |
| C3 – C5          | 1.375 (5) | C1 – P1 – C1    | 107.99 (18) |
| C4 – C6          | 1.382 (4) |                 |             |
| C5 – C6          | 1.402 (5) |                 |             |

Selected bond lengths and angles for the substructure of the tetragonal polymorph of  $(\text{PPh}_4)_2\text{Zn}(\text{WS}_4)_2$  using a subcell model.

| Atom | $x/a$      | $y/b$      | $z/c$       | $U_{\text{iso}}/\text{Å}^2$ |
|------|------------|------------|-------------|-----------------------------|
| W1   | 0.1830 (3) | 0.0195 (4) | -0.0784 (4) | 0.125 (3)                   |
| W2   | 0.2612 (3) | 0.3761 (5) | 0.0079 (4)  | 0.125 (3)                   |
| Zn1  | 0.2214 (7) | 0.194 (1)  | -0.0312 (8) | 0.084 (6)                   |
| S1   | 0.286 (1)  | 0.078 (2)  | -0.047 (1)  | 0.168 (5)                   |
| S2   | 0.168 (1)  | -0.030 (2) | -0.190 (2)  | 0.168 (5)                   |
| S3   | 0.179 (1)  | -0.087 (2) | -0.013 (2)  | 0.168 (5)                   |
| S4   | 0.106 (1)  | 0.127 (2)  | -0.065 (1)  | 0.168 (5)                   |
| S5   | 0.253 (2)  | 0.277 (2)  | 0.083 (2)   | 0.168 (5)                   |
| S6   | 0.239 (2)  | 0.320 (2)  | -0.100 (2)  | 0.168 (5)                   |
| S7   | 0.191 (1)  | 0.459 (2)  | 0.018 (2)   | 0.168 (5)                   |
| S8   | 0.382 (1)  | 0.430 (2)  | 0.054 (2)   | 0.168 (5)                   |
| P1   | 0.8851 (5) | 0.327 (1)  | 0.2266 (6)  | 0.112 (5)                   |
| P2   | 0.5391 (5) | 0.092 (1)  | 0.2111 (6)  | 0.112 (5)                   |

**Selected fractional atomic coordinates and isotropic temperature factors for the monoclinic polymorph of  $(\text{PPh}_4)_2\text{Zn}(\text{WS}_4)_2$ .**

|                           | Cation 1   | Cation 2   |
|---------------------------|------------|------------|
| $x_{\text{rot}} / ^\circ$ | -94.4 (3)  | -234.9 (4) |
| $y_{\text{rot}} / ^\circ$ | 145.9 (2)  | -76.5 (2)  |
| $z_{\text{rot}} / ^\circ$ | -180.1 (2) | 27.4 (4)   |
| torsion 1 / $^\circ$      | 73 (1)     | -67 (1)    |
| torsion 2 / $^\circ$      | -19 (1)    | 21 (1)     |
| torsion 3 / $^\circ$      | -21 (1)    | 79 (1)     |
| torsion 4 / $^\circ$      | 83 (1)     | 13 (1)     |

**Angles of rotation about the axis and torsion angles in the two crystallographically independent  $\text{PPh}_4$  units in monoclinic  $(\text{PPh}_4)_2\text{Zn}(\text{WS}_4)_2$ .**

| Bond lengths /Å |          | Bond Angles /° |         |
|-----------------|----------|----------------|---------|
| Zn – S          | 2.22 (4) | S – Zn – S     | 91 (1)  |
|                 | 2.28 (3) |                | 96 (1)  |
|                 | 2.42 (4) |                | 113(1)  |
|                 | 2.43 (4) |                | 115 (1) |
| W1 – S          | 2.03 (3) |                | 120 (1) |
|                 | 2.08 (4) |                | 124 (1) |
|                 | 2.17 (3) |                | 102 (1) |
|                 | 2.26 (3) |                | 104 (1) |
| W2 – S          | 1.89 (3) |                | 106 (1) |
|                 | 2.13 (4) |                | 106 (1) |
|                 | 2.14(4)  |                | 109 (1) |
|                 | 2.29 (3) |                | 111 (1) |
|                 |          | 111 (9)        |         |
|                 |          | 117 (1)        |         |

**Selected Bond lengths and angles in the anion in monoclinic  $(PPh_4)_2Zn(WS_4)_2$ .**

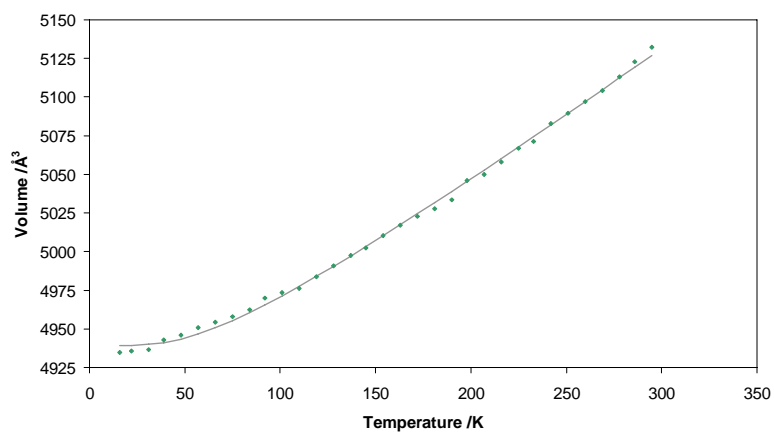

**The variation in cell volume with temperature in monoclinic  $(PPh_4)_2Zn(WS_4)_2$ . Observed data are shown in green calculated values are shown in grey.**

|                                                   | <i>a</i>                  | <i>b</i>                | <i>c</i>                  |
|---------------------------------------------------|---------------------------|-------------------------|---------------------------|
| $a_0 / \text{\AA}$                                | 18.4096 (1)               | 15.077 (3)              | 18.871 (2)                |
| $\theta_l / \text{K}$                             | 174 (8)                   | 258 (15)                | 77 (17)                   |
| $c_l / \text{K}^{-1}$                             | $56.5 (8) \times 10^{-6}$ | $98 (3) \times 10^{-6}$ | $22.6 (5) \times 10^{-6}$ |
| $\alpha_{15\text{K}-300\text{K}} / \text{K}^{-1}$ | $44 (1) \times 10^{-6}$   | $66 (3) \times 10^{-6}$ | $21.0 (9) \times 10^{-6}$ |

**Thermal expansion parameters for the monoclinic form of  $(\text{PPh}_4)_2\text{Zn}(\text{WS}_4)_2$ .**

| Atom   | x           | y           | z           | Occupancy  | $U_{\text{iso}}/\text{Å}^2$ |
|--------|-------------|-------------|-------------|------------|-----------------------------|
| Zn(1)  | 0           | 0           | 0           | 0.64218(3) | 0.01281(7)                  |
| Zn(2)  | -0.5        | 0           | 0.25        | 0.77212(3) | 0.01432(7)                  |
| Zn(3)  | 0           | 0           | -0.5        | 0.35782(3) | 0.01317(7)                  |
| Zn(4)  | -0.5        | 0           | 0.75        | 0.22788(3) | 0.09234(7)                  |
| W(1)   | -0.5        | 0           | 0.46551(7)  | 0.77212(3) | 0.01207(6)                  |
| W(2)   | 0           | 0           | -0.21543(8) | 0.64218(3) | 0.00565(6)                  |
| W(3)   | -0.5        | 0           | 0.53263(9)  | 0.22788(3) | 0.09094(7)                  |
| W(4)   | 0           | 0           | -0.28483(8) | 0.35782(3) | 0.01015(6)                  |
| S(1)   | -0.08544(9) | 0.04071(9)  | 0.11658(9)  | 0.64218(3) | 0.01177(3)                  |
| S(2)   | -0.54765(9) | -0.08338(9) | 0.13412(9)  | 0.77212(3) | 0.01177(3)                  |
| S(3)   | -0.08694(9) | 0.04299(9)  | -0.30630(9) | 0.64218(3) | 0.01177(3)                  |
| S(4)   | -0.54495(9) | -0.07994(9) | 0.55987(9)  | 0.77212(3) | 0.01177(3)                  |
| S(5)   | -0.04500(9) | -0.09043(9) | -0.19568(9) | 0.35782(3) | 0.01841(3)                  |
| S(6)   | -0.44359(9) | 0.08252(9)  | 0.63601(9)  | 0.22788(3) | 0.01841(3)                  |
| S(7)   | -0.57219(9) | 0.04651(9)  | 0.43547(9)  | 0.22788(3) | 0.01841(3)                  |
| S(8)   | -0.08620(9) | 0.03820(9)  | -0.38103(9) | 0.35782(3) | 0.01841(3)                  |
| P(1)   | -0.25074(9) | 0.25342(8)  | 0.11999(9)  |            | 0.01180(7)                  |
| C(11)  | -0.22890(9) | 0.17533(9)  | 0.04442(9)  |            | 0.03111(7)                  |
| C(12)  | -0.17441(7) | 0.18940(7)  | -0.02218(7) |            | 0.02881(7)                  |
| C(13)  | -0.14997(7) | 0.13575(7)  | -0.08456(7) |            | 0.01132(7)                  |
| C(14)  | -0.18113(7) | 0.06859(7)  | -0.08149(7) |            | 0.03125(7)                  |
| C(15)  | -0.23759(7) | 0.05527(7)  | -0.01774(7) |            | 0.03197(7)                  |
| C(16)  | -0.26142(7) | 0.10858(7)  | 0.04535(7)  |            | 0.02627(7)                  |
| C(21)  | -0.31912(9) | 0.22617(9)  | 0.20305(9)  |            | 0.00048(7)                  |
| C(22)  | -0.31067(7) | 0.16824(7)  | 0.26650(7)  |            | 0.01690(7)                  |
| C(23)  | -0.36766(7) | 0.14676(7)  | 0.32504(7)  |            | 0.02977(7)                  |
| C(24)  | -0.42979(7) | 0.18752(7)  | 0.32773(7)  |            | 0.01499(7)                  |
| C(25)  | -0.43812(7) | 0.24562(7)  | 0.26477(7)  |            | 0.00894(7)                  |
| C(26)  | -0.38251(7) | 0.26519(7)  | 0.20258(7)  |            | 0.00946(7)                  |
| C(31)  | -0.27364(9) | 0.32894(9)  | 0.04334(9)  |            | 0.02487(7)                  |
| C(32)  | -0.32879(7) | 0.31351(7)  | -0.02158(7) |            | 0.04488(7)                  |
| C(33)  | -0.35324(7) | 0.36598(7)  | -0.08561(7) |            | 0.01450(7)                  |
| C(34)  | -0.32602(7) | 0.43467(7)  | -0.07971(7) |            | 0.03014(7)                  |
| C(35)  | -0.26979(7) | 0.44968(7)  | -0.01623(7) |            | 0.02009(7)                  |
| C(36)  | -0.24276(7) | 0.39643(7)  | 0.04406(7)  |            | 0.01674(7)                  |
| C(41)  | -0.17955(9) | 0.27947(9)  | 0.20288(9)  |            | 0.00231(7)                  |
| C(42)  | -0.11662(7) | 0.24041(7)  | 0.20274(7)  |            | 0.01183(7)                  |
| C(43)  | -0.06024(7) | 0.26161(7)  | 0.26276(7)  |            | 0.02218(7)                  |
| C(44)  | -0.06597(7) | 0.32379(7)  | 0.31881(7)  |            | 0.03008(7)                  |
| C(45)  | -0.12814(7) | 0.36422(7)  | 0.31615(7)  |            | 0.01368(7)                  |
| C(46)  | -0.18601(7) | 0.34049(7)  | 0.26094(7)  |            | 0.01135(7)                  |
| H(121) | -0.15429(7) | 0.23869(7)  | -0.02811(7) |            | 0.0441                      |
| H(131) | -0.10799(7) | 0.14488(7)  | -0.12837(7) |            | 0.0493                      |
| H(141) | -0.15971(7) | 0.02840(7)  | -0.12002(7) |            | 0.0525                      |
| H(151) | -0.25917(7) | 0.00650(7)  | -0.01388(7) |            | 0.0559                      |
| H(161) | -0.30402(7) | 0.09988(7)  | 0.08817(7)  |            | 0.0548                      |
| H(221) | -0.26467(7) | 0.14118(7)  | 0.26372(7)  |            | 0.0406                      |
| H(231) | -0.36042(7) | 0.10418(7)  | 0.36841(7)  |            | 0.0394                      |
| H(241) | -0.46896(7) | 0.17150(7)  | 0.37271(7)  |            | 0.0437                      |
| H(251) | -0.48469(7) | 0.27177(7)  | 0.26562(7)  |            | 0.0451                      |
| H(261) | -0.38875(7) | 0.30920(7)  | 0.16169(7)  |            | 0.0457                      |
| H(321) | -0.35059(7) | 0.26482(7)  | -0.02502(7) |            | 0.0525                      |
| H(331) | -0.39786(7) | 0.35810(7)  | -0.12466(7) |            | 0.0478                      |
| H(341) | -0.34779(7) | 0.47513(7)  | -0.11731(7) |            | 0.0486                      |
| H(351) | -0.24703(7) | 0.49799(7)  | -0.01445(7) |            | 0.0514                      |
| H(361) | -0.19907(7) | 0.40456(7)  | 0.08496(7)  |            | 0.0522                      |
| H(421) | -0.11039(7) | 0.19736(7)  | 0.15995(7)  |            | 0.0445                      |
| H(431) | -0.01466(7) | 0.23381(7)  | 0.26514(7)  |            | 0.0458                      |
| H(441) | -0.02722(7) | 0.33820(7)  | 0.36549(7)  |            | 0.0466                      |
| H(451) | -0.13328(7) | 0.40891(7)  | 0.35590(7)  |            | 0.0428                      |
| H(461) | -0.23190(7) | 0.36778(7)  | 0.25923(7)  |            | 0.0436                      |

**Table.1 Atomic positions in the superstructure of the tetragonal form of  $(\text{PPh}_4)_2\text{Zn}(\text{WS}_4)_2$ .**

| Bond Lengths /Å |            |              |            |               |            |
|-----------------|------------|--------------|------------|---------------|------------|
| Zn(1) - W(2)    | 2.9233(13) | W(1) - S(4)  | 2.1504(15) | P(1) - C(31)  | 1.824(2)   |
| Zn(1) - W(2)    | 2.9233(13) | W(1) - S(7)  | 1.6542(17) | P(1) - C(41)  | 1.792(2)   |
| Zn(1) - S(1)    | 2.3835(15) | W(1) - S(7)  | 1.6542(17) | C(11) - C(12) | 1.3876(19) |
| Zn(1) - S(1)    | 2.3835(15) | W(2) - W(4)  | 0.9378(13) | C(11) - C(16) | 1.392(2)   |
| Zn(1) - S(1)    | 2.3835(15) | W(2) - S(1)  | 2.2201(16) | C(12) - C(13) | 1.3909(16) |
| Zn(1) - S(1)    | 2.3835(15) | W(2) - S(1)  | 2.2201(16) | C(13) - C(14) | 1.3874(17) |
| Zn(2) - W(1)    | 2.9220(12) | W(2) - S(3)  | 2.1923(16) | C(14) - C(15) | 1.3870(16) |
| Zn(2) - W(1)    | 2.9220(12) | W(2) - S(3)  | 2.1923(16) | C(15) - C(16) | 1.3894(16) |
| Zn(2) - S(2)    | 2.3931(14) | W(2) - S(5)  | 1.8948(17) | C(21) - C(22) | 1.3926(19) |
| Zn(2) - S(2)    | 2.3931(14) | W(2) - S(5)  | 1.8948(17) | C(21) - C(26) | 1.397(2)   |
| Zn(2) - S(2)    | 2.3931(14) | W(3) - S(4)  | 1.7649(16) | C(22) - C(23) | 1.3866(16) |
| Zn(2) - S(2)    | 2.3931(14) | W(3) - S(4)  | 1.7649(16) | C(23) - C(24) | 1.3955(17) |
| Zn(3) - W(4)    | 2.9206(13) | W(3) - S(6)  | 2.3413(18) | C(24) - C(25) | 1.3926(16) |
| Zn(3) - W(4)    | 2.9206(13) | W(3) - S(6)  | 2.3413(18) | C(25) - C(26) | 1.3916(16) |
| Zn(3) - S(8)    | 2.3862(16) | W(3) - S(7)  | 2.0715(18) | C(31) - C(32) | 1.3876(19) |
| Zn(3) - S(8)    | 2.3862(16) | W(3) - S(7)  | 2.0715(18) | C(31) - C(36) | 1.388(2)   |
| Zn(3) - S(8)    | 2.3862(16) | W(4) - S(3)  | 1.8370(16) | C(32) - C(33) | 1.3879(16) |
| Zn(3) - S(8)    | 2.3862(16) | W(4) - S(3)  | 1.8370(16) | C(33) - C(34) | 1.3863(17) |
| Zn(4) - W(3)    | 2.9539(16) | W(4) - S(5)  | 2.2308(17) | C(34) - C(35) | 1.3902(16) |
| Zn(4) - W(3)    | 2.9539(16) | W(4) - S(5)  | 2.2308(17) | C(35) - C(36) | 1.3879(16) |
| Zn(4) - S(6)    | 2.4327(16) | W(4) - S(8)  | 2.2059(17) | C(41) - C(42) | 1.390(2)   |
| Zn(4) - S(6)    | 2.4327(16) | W(4) - S(8)  | 2.2059(17) | C(41) - C(46) | 1.3898(19) |
| Zn(4) - S(6)    | 2.4327(16) | S(1) - S(5)  | 1.0680(18) | C(42) - C(43) | 1.3943(16) |
| Zn(4) - S(6)    | 2.4327(16) | S(2) - S(7)  | 0.9610(18) | C(43) - C(44) | 1.3961(16) |
| W(1) - W(3)     | 0.9057(15) | S(3) - S(8)  | 1.0270(18) | C(44) - C(45) | 1.3906(17) |
| W(1) - S(2)     | 2.2447(15) | S(4) - S(6)  | 1.0447(18) | C(45) - C(46) | 1.3912(16) |
| W(1) - S(2)     | 2.2447(15) | P(1) - C(11) | 1.818(2)   |               |            |
| W(1) - S(4)     | 2.1504(15) | P(1) - C(21) | 1.796(2)   |               |            |

| Bond Angles /°      |           |                     |            |
|---------------------|-----------|---------------------|------------|
| W(2) - Zn(1) - W(2) | 180       | Zn(4) - W(3) - S(4) | 77.55(6)   |
| W(2) - Zn(1) - S(1) | 131.85(3) | W(1) - W(3) - S(4)  | 102.45(6)  |
| W(2) - Zn(1) - S(1) | 48.15(3)  | Zn(4) - W(3) - S(4) | 77.55(6)   |
| W(2) - Zn(1) - S(1) | 48.15(3)  | W(1) - W(3) - S(4)  | 102.45(6)  |
| W(2) - Zn(1) - S(1) | 131.85(3) | S(4) - W(3) - S(4)  | 155.10(11) |
| S(1) - Zn(1) - S(1) | 116.44(4) | Zn(4) - W(3) - S(6) | 53.18(4)   |
| W(2) - Zn(1) - S(1) | 131.85(3) | W(1) - W(3) - S(6)  | 126.82(4)  |
| W(2) - Zn(1) - S(1) | 48.15(3)  | S(4) - W(3) - S(6)  | 130.53(8)  |
| S(1) - Zn(1) - S(1) | 96.29(7)  | S(4) - W(3) - S(6)  | 24.75(6)   |
| S(1) - Zn(1) - S(1) | 116.44(4) | Zn(4) - W(3) - S(6) | 53.18(4)   |
| W(2) - Zn(1) - S(1) | 48.15(3)  | W(1) - W(3) - S(6)  | 126.82(4)  |
| W(2) - Zn(1) - S(1) | 131.85(3) | S(4) - W(3) - S(6)  | 24.75(6)   |
| S(1) - Zn(1) - S(1) | 116.44(4) | S(4) - W(3) - S(6)  | 130.53(8)  |
| S(1) - Zn(1) - S(1) | 96.29(7)  | S(6) - W(3) - S(6)  | 106.36(9)  |
| S(1) - Zn(1) - S(1) | 116.44(4) | Zn(4) - W(3) - S(7) | 129.27(5)  |
| W(1) - Zn(2) - W(1) | 180       | W(1) - W(3) - S(7)  | 50.73(5)   |
| W(1) - Zn(2) - S(2) | 131.28(3) | S(4) - W(3) - S(7)  | 100.25(7)  |
| W(1) - Zn(2) - S(2) | 48.72(3)  | S(4) - W(3) - S(7)  | 95.45(7)   |
| W(1) - Zn(2) - S(2) | 48.72(3)  | S(6) - W(3) - S(7)  | 113.42(6)  |
| W(1) - Zn(2) - S(2) | 131.28(3) | Zn(4) - W(3) - S(7) | 129.27(5)  |
| S(2) - Zn(2) - S(2) | 115.80(4) | W(1) - W(3) - S(7)  | 50.73(5)   |
| W(1) - Zn(2) - S(2) | 131.28(3) | S(4) - W(3) - S(7)  | 95.45(7)   |
| W(1) - Zn(2) - S(2) | 48.72(3)  | S(4) - W(3) - S(7)  | 100.25(7)  |
| S(2) - Zn(2) - S(2) | 97.44(7)  | S(6) - W(3) - S(7)  | 111.18(6)  |
| S(2) - Zn(2) - S(2) | 115.80(4) | S(6) - W(3) - S(7)  | 111.18(6)  |
| W(1) - Zn(2) - S(2) | 48.72(3)  | S(6) - W(3) - S(7)  | 113.42(6)  |
| W(1) - Zn(2) - S(2) | 131.28(3) | S(7) - W(3) - S(7)  | 101.45(10) |
| S(2) - Zn(2) - S(2) | 115.80(4) | Zn(3) - W(4) - W(2) | 179.99     |
| S(2) - Zn(2) - S(2) | 97.44(7)  | Zn(3) - W(4) - S(3) | 80.77(5)   |
| S(2) - Zn(2) - S(2) | 115.80(4) | W(2) - W(4) - S(3)  | 99.23(5)   |
| W(4) - Zn(3) - W(4) | 180       | Zn(3) - W(4) - S(3) | 80.77(5)   |
| W(4) - Zn(3) - S(8) | 47.83(4)  | W(2) - W(4) - S(3)  | 99.23(5)   |
| W(4) - Zn(3) - S(8) | 132.17(4) | S(3) - W(4) - S(3)  | 161.55(10) |
| W(4) - Zn(3) - S(8) | 132.17(4) | Zn(3) - W(4) - S(5) | 122.78(4)  |
| W(4) - Zn(3) - S(8) | 47.83(4)  | W(2) - W(4) - S(5)  | 57.22(4)   |
| S(8) - Zn(3) - S(8) | 116.79(4) | S(3) - W(4) - S(5)  | 94.72(7)   |
| W(4) - Zn(3) - S(8) | 47.83(4)  | S(3) - W(4) - S(5)  | 95.24(6)   |
| W(4) - Zn(3) - S(8) | 132.17(4) | Zn(3) - W(4) - S(5) | 122.78(4)  |
| S(8) - Zn(3) - S(8) | 95.66(7)  | W(2) - W(4) - S(5)  | 57.22(4)   |
| S(8) - Zn(3) - S(8) | 116.79(4) | S(3) - W(4) - S(5)  | 95.24(6)   |
| W(4) - Zn(3) - S(8) | 132.17(4) | S(3) - W(4) - S(5)  | 94.72(7)   |
| W(4) - Zn(3) - S(8) | 47.83(4)  | S(5) - W(4) - S(5)  | 114.43(9)  |

|                     |            |                       |            |
|---------------------|------------|-----------------------|------------|
| S(8) - Zn(3) - S(8) | 116.79(4)  | Zn(3) - W(4) - S(8)   | 53.29(4)   |
| S(8) - Zn(3) - S(8) | 95.66(7)   | W(2) - W(4) - S(8)    | 126.71(4)  |
| S(8) - Zn(3) - S(8) | 116.79(4)  | S(3) - W(4) - S(8)    | 27.54(5)   |
| W(3) - Zn(4) - W(3) | 180        | S(3) - W(4) - S(8)    | 134.03(7)  |
| W(3) - Zn(4) - S(6) | 50.39(4)   | S(5) - W(4) - S(8)    | 107.20(6)  |
| W(3) - Zn(4) - S(6) | 129.61(4)  | Zn(3) - W(4) - S(8)   | 53.29(4)   |
| W(3) - Zn(4) - S(6) | 129.61(4)  | W(2) - W(4) - S(8)    | 126.71(4)  |
| W(3) - Zn(4) - S(6) | 50.39(4)   | S(3) - W(4) - S(8)    | 134.03(7)  |
| S(6) - Zn(4) - S(6) | 113.98(4)  | S(3) - W(4) - S(8)    | 27.55(5)   |
| W(3) - Zn(4) - S(6) | 50.39(4)   | S(5) - W(4) - S(8)    | 110.59(6)  |
| W(3) - Zn(4) - S(6) | 129.61(4)  | S(5) - W(4) - S(8)    | 110.59(6)  |
| S(6) - Zn(4) - S(6) | 100.79(7)  | S(5) - W(4) - S(8)    | 107.20(6)  |
| S(6) - Zn(4) - S(6) | 113.98(4)  | S(8) - W(4) - S(8)    | 106.59(9)  |
| W(3) - Zn(4) - S(6) | 129.61(4)  | Zn(1) - S(1) - W(2)   | 78.75(6)   |
| W(3) - Zn(4) - S(6) | 50.39(4)   | Zn(1) - S(1) - S(5)   | 137.19(15) |
| S(6) - Zn(4) - S(6) | 113.98(4)  | W(2) - S(1) - S(5)    | 58.48(12)  |
| S(6) - Zn(4) - S(6) | 100.79(7)  | Zn(2) - S(2) - W(1)   | 78.03(5)   |
| S(6) - Zn(4) - S(6) | 113.98(4)  | Zn(2) - S(2) - S(7)   | 119.33(15) |
| Zn(2) - W(1) - W(3) | 179.99     | W(1) - S(2) - S(7)    | 41.60(12)  |
| Zn(2) - W(1) - S(2) | 53.24(4)   | W(2) - S(3) - W(4)    | 24.98(4)   |
| W(3) - W(1) - S(2)  | 126.76(4)  | W(2) - S(3) - S(8)    | 121.57(15) |
| Zn(2) - W(1) - S(2) | 53.24(4)   | W(4) - S(3) - S(8)    | 96.65(14)  |
| W(3) - W(1) - S(2)  | 126.76(4)  | W(1) - S(4) - W(3)    | 24.28(5)   |
| S(2) - W(1) - S(2)  | 106.49(8)  | W(1) - S(4) - S(6)    | 134.12(15) |
| Zn(2) - W(1) - S(4) | 126.73(4)  | W(3) - S(4) - S(6)    | 110.23(15) |
| W(3) - W(1) - S(4)  | 53.27(4)   | W(2) - S(5) - W(4)    | 24.59(4)   |
| S(2) - W(1) - S(4)  | 111.27(6)  | W(2) - S(5) - S(1)    | 92.80(14)  |
| S(2) - W(1) - S(4)  | 110.67(6)  | W(4) - S(5) - S(1)    | 117.38(15) |
| Zn(2) - W(1) - S(4) | 126.73(4)  | Zn(4) - S(6) - W(3)   | 76.42(6)   |
| W(3) - W(1) - S(4)  | 53.27(4)   | Zn(4) - S(6) - S(4)   | 120.55(15) |
| S(2) - W(1) - S(4)  | 110.67(6)  | W(3) - S(6) - S(4)    | 45.02(11)  |
| S(2) - W(1) - S(4)  | 111.27(6)  | W(1) - S(7) - W(3)    | 25.08(4)   |
| S(4) - W(1) - S(4)  | 106.54(8)  | W(1) - S(7) - S(2)    | 115.71(16) |
| Zn(2) - W(1) - S(7) | 75.80(5)   | W(3) - S(7) - S(2)    | 140.62(17) |
| W(3) - W(1) - S(7)  | 104.20(5)  | Zn(3) - S(8) - W(4)   | 78.88(6)   |
| S(2) - W(1) - S(7)  | 22.69(6)   | Zn(3) - S(8) - S(3)   | 134.49(15) |
| S(2) - W(1) - S(7)  | 128.98(7)  | W(4) - S(8) - S(3)    | 55.81(12)  |
| S(4) - W(1) - S(7)  | 100.91(7)  | C(11) - P(1) - C(21)  | 106.88(10) |
| Zn(2) - W(1) - S(7) | 75.80(5)   | C(11) - P(1) - C(31)  | 110.58(9)  |
| W(3) - W(1) - S(7)  | 104.20(5)  | C(21) - P(1) - C(31)  | 113.24(11) |
| S(2) - W(1) - S(7)  | 128.98(7)  | C(11) - P(1) - C(41)  | 114.14(11) |
| S(2) - W(1) - S(7)  | 22.69(6)   | C(21) - P(1) - C(41)  | 103.29(9)  |
| S(4) - W(1) - S(7)  | 95.97(7)   | C(31) - P(1) - C(41)  | 108.60(10) |
| S(4) - W(1) - S(7)  | 95.97(7)   | P(1) - C(11) - C(12)  | 112.62(12) |
| S(4) - W(1) - S(7)  | 100.91(7)  | P(1) - C(11) - C(16)  | 127.55(12) |
| S(7) - W(1) - S(7)  | 151.61(10) | C(12) - C(11) - C(16) | 119.78(13) |
| Zn(1) - W(2) - W(4) | 179.99     | C(11) - C(12) - C(13) | 120.10(12) |
| Zn(1) - W(2) - S(1) | 53.10(4)   | C(12) - C(13) - C(14) | 119.87(10) |
| W(4) - W(2) - S(1)  | 126.90(4)  | C(13) - C(14) - C(15) | 120.20(10) |
| Zn(1) - W(2) - S(1) | 53.10(4)   | C(14) - C(15) - C(16) | 119.86(11) |
| W(4) - W(2) - S(1)  | 126.90(4)  | C(11) - C(16) - C(15) | 120.07(11) |
| S(1) - W(2) - S(1)  | 106.20(8)  | P(1) - C(21) - C(22)  | 121.16(13) |
| Zn(1) - W(2) - S(3) | 124.20(4)  | P(1) - C(21) - C(26)  | 118.10(11) |
| W(4) - W(2) - S(3)  | 55.80(4)   | C(22) - C(21) - C(26) | 120.75(13) |
| S(1) - W(2) - S(3)  | 109.24(6)  | C(21) - C(22) - C(23) | 119.10(12) |
| S(1) - W(2) - S(3)  | 110.21(6)  | C(22) - C(23) - C(24) | 120.16(11) |
| Zn(1) - W(2) - S(3) | 124.20(4)  | C(23) - C(24) - C(25) | 120.56(10) |
| W(4) - W(2) - S(3)  | 55.80(4)   | C(24) - C(25) - C(26) | 119.25(11) |
| S(1) - W(2) - S(3)  | 110.21(6)  | C(21) - C(26) - C(25) | 119.90(11) |
| S(1) - W(2) - S(3)  | 109.24(6)  | P(1) - C(31) - C(32)  | 112.63(12) |
| S(3) - W(2) - S(3)  | 111.60(8)  | P(1) - C(31) - C(36)  | 126.87(12) |
| Zn(1) - W(2) - S(5) | 81.80(5)   | C(32) - C(31) - C(36) | 120.48(13) |
| W(4) - W(2) - S(5)  | 98.20(5)   | C(31) - C(32) - C(33) | 119.46(12) |
| S(1) - W(2) - S(5)  | 134.90(7)  | C(32) - C(33) - C(34) | 120.15(10) |
| S(1) - W(2) - S(5)  | 28.72(5)   | C(33) - C(34) - C(35) | 119.97(10) |
| S(3) - W(2) - S(5)  | 94.34(7)   | C(34) - C(35) - C(36) | 119.86(11) |
| Zn(1) - W(2) - S(5) | 81.80(5)   | C(31) - C(36) - C(35) | 119.70(11) |
| W(4) - W(2) - S(5)  | 98.20(5)   | P(1) - C(41) - C(42)  | 118.64(12) |
| S(1) - W(2) - S(5)  | 28.72(5)   | P(1) - C(41) - C(46)  | 120.92(13) |
| S(1) - W(2) - S(5)  | 134.90(7)  | C(42) - C(41) - C(46) | 120.40(13) |
| S(3) - W(2) - S(5)  | 94.85(6)   | C(41) - C(42) - C(43) | 119.62(11) |
| S(3) - W(2) - S(5)  | 94.85(6)   | C(42) - C(43) - C(44) | 119.75(11) |



|                     |            |                       |            |
|---------------------|------------|-----------------------|------------|
| S(3) - W(2) - S(5)  | 94.34(7)   | C(43) - C(44) - C(45) | 120.41(10) |
| S(5) - W(2) - S(5)  | 163.61(10) | C(44) - C(45) - C(46) | 119.47(11) |
| Zn(4) - W(3) - W(1) | 179.99     | C(41) - C(46) - C(45) | 120.09(12) |

**Bond lengths and angles in the superstructure of tetragonal form of  $(PPh_4)_2Zn(WS_4)_2$ .**
